# Supplementary material for: Homology modeling, virtual screening and MD simulations for the identification of NUAK1 and ULK1 potential dual inhibitors
Source: Royal Society of Chemistry journal article supplement (doi:10.1039/d1nj03690d), 2022-01-01
Supplement: d1nj03690d1.pdf [file d1nj03690d1.pdf]

**Table S1** Pharmacophore summary.

| Pharmacophore | AUROC                      | Feature |
|---------------|----------------------------|---------|
| 4WNO-01*      | 0.805                      | DDHH    |
| 4WNO-02       | 0.607                      | ADHH    |
| 4WNP          | No pharmacophore generated |         |
| 5CI7-01       | 0.784                      | ADHHP   |
| 5CI7-02       | 0.690                      | DHHP    |
| 5CI7-03       | 0.801                      | ADHP    |
| 5CI7-04       | 0.753                      | ADHP    |
| 5CI7-05       | 0.541                      | AHHP    |
| 5CI7-06       | 0.667                      | ADHH    |
| 6MNH-01       | 0.674                      | AADH    |
| 6MNH-02       | 0.749                      | AAHH    |
| 6QAS-01       | 0.608                      | AHHH    |

\* True positive: 43, false negatives: 3, true positive rate: 0.935.

**Table S2** Homology model summary.

| Model Scores |                  |                     |               |
|--------------|------------------|---------------------|---------------|
| Name         | PDF Total Energy | PDF Physical Energy | DOPE Score*   |
| NUAK1.M0018  | 2334.8259        | 1231.28618060       | -34203.781250 |
| NUAK1.M0007  | 2344.2502        | 1247.03479372       | -34237.679688 |
| NUAK1.M0004  | 2345.6169        | 1226.63662998       | -33729.171875 |
| NUAK1.M0006  | 2346.4548        | 1244.79779120       | -34100.566406 |
| NUAK1.M0016  | 2365.7112        | 1242.31421816       | -34300.804688 |
| NUAK1.M0008  | 2381.8101        | 1245.26049660       | -34237.273438 |
| NUAK1.M0003  | 2412.6985        | 1254.21213695       | -34010.359375 |
| NUAK1.M0020  | 2417.3689        | 1243.48410610       | -34306.800781 |
| NUAK1.M0010  | 2420.5493        | 1247.51451240       | -33814.273438 |
| NUAK1.M0011  | 2434.2039        | 1266.74076130       | -33925.558594 |
| NUAK1.M0009  | 2439.0706        | 1254.21984960       | -34229.218750 |
| NUAK1.M0001  | 2443.0352        | 1249.76974990       | -34137.761719 |
| NUAK1.M0005  | 2443.9963        | 1246.00901009       | -34062.078125 |
| NUAK1.M0019  | 2459.6414        | 1248.45637300       | -34291.367188 |
| NUAK1.M0014  | 2462.1699        | 1245.18211603       | -33909.878906 |
| NUAK1.M0013  | 2484.7612        | 1258.08922800       | -33993.703125 |
| NUAK1.M0002  | 2506.2153        | 1269.86334210       | -34078.839844 |
| NUAK1.M0012  | 2516.3420        | 1280.44279549       | -34188.160156 |
| NUAK1.M0017  | 2516.9004        | 1250.93798350       | -33832.425781 |
| NUAK1.M0015  | 2583.1794        | 1256.70395440       | -33826.605469 |

\*DOPE score is a statistical energy score that use to compare different conformations of a protein. A lower score indicates smaller model errors.



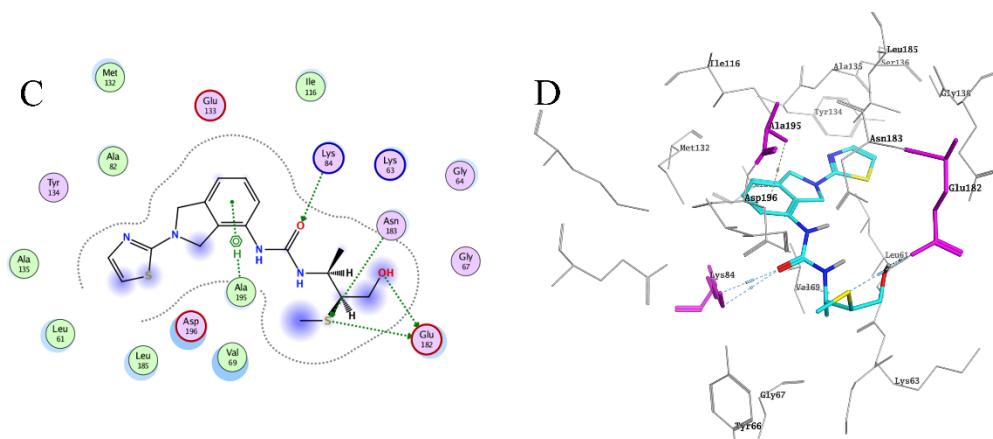

**Fig. S1** The molecular docking 2D and 3D interaction diagrams of compound 4 and compound 5 with NUAK1. NUAK1-compound 4 (A, B), NUAK1-compound 5 (C, D). The color scheme is the same as.

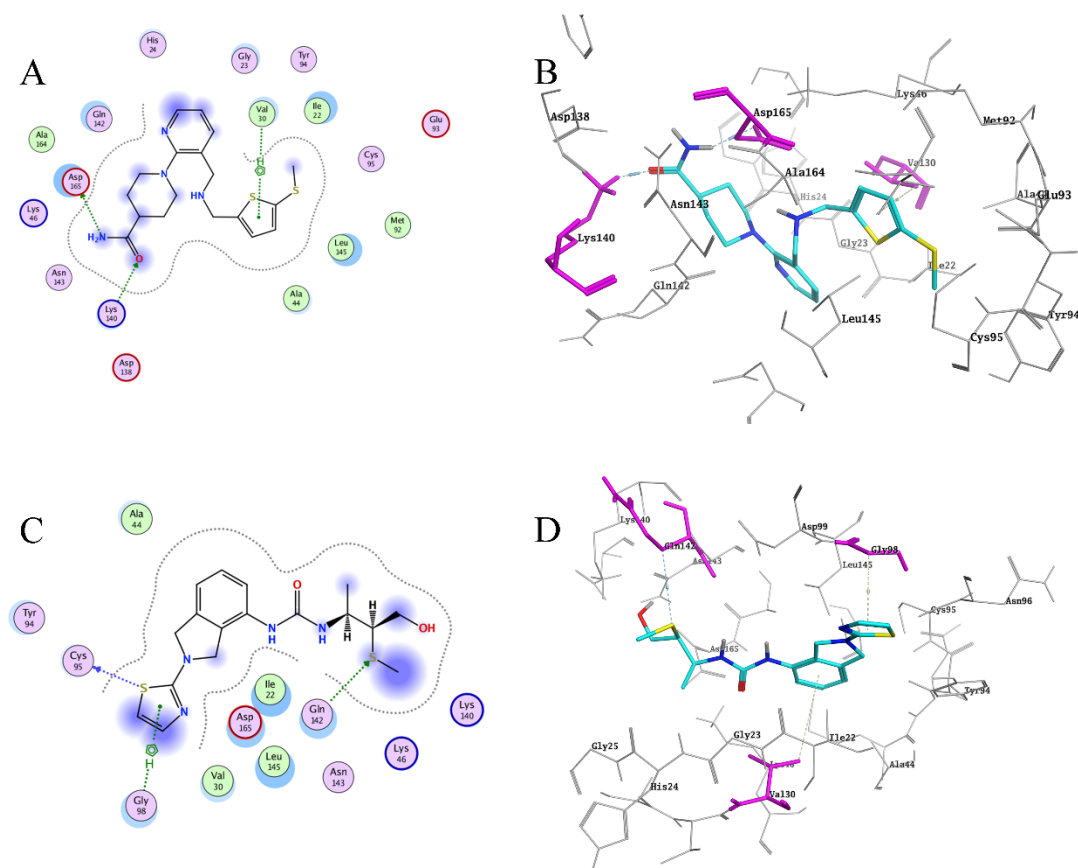

**Fig. S2** The molecular docking 2D and 3D interaction diagrams of compound 4 and compound 5 with ULK1. ULK1-compound 4 (A, B), ULK1-compound 5 (C, D). The color scheme is the same as Fig.

**Table S5** Interaction summary of each hit compound with NUAK1. Compound, interaction with residues in NUAK, type of interaction, distance in angstroms and interaction energies.

| <b>Compound</b> | <b>Interactions</b> | <b>Residues</b> | <b>Distance (Å)</b> | <b>Interaction energies (kcal/mol)</b> |
|-----------------|---------------------|-----------------|---------------------|----------------------------------------|
| 1               | H-donor             | LYS 63          | 2.81                | -2.4                                   |
|                 | H-donor             | GLU 133         | 2.85                | -7.4                                   |
|                 | H-acceptor          | LYS 63          | 3.72                | -1.7                                   |
|                 | H-acceptor          | ASN 183         | 3.01                | -1.2                                   |
|                 | H-acceptor          | ALA 135         | 3.17                | -3.4                                   |
| 2               | H-acceptor          | LYS 84          | 2.97                | -11.0                                  |
|                 | H-donor             | GLU 139         | 3.35                | -0.6                                   |
| 3               | H-donor             | GLU 139         | 3.28                | -2.3                                   |
|                 | H-donor             | LEU 61          | 2.89                | -3.1                                   |
|                 | H-acceptor          | LYS 63          | 3.58                | -0.6                                   |
|                 | pi-H                | VAL 69          | 3.66                | -1.0                                   |
|                 | pi-H                | ASP 196         | 4.33                | -1.7                                   |
| 4               | H-donor             | ALA 135         | 3.21                | -0.3                                   |
|                 | H-donor             | ASP 196         | 3.19                | -1.2                                   |
|                 | H-acceptor          | LYS 84          | 3.85                | -3.0                                   |
|                 | H-acceptor          | LYS 84          | 3.61                | -0.8                                   |
| 5               | H-donor             | GLU 182         | 3.50                | -1.9                                   |
|                 | H-donor             | GLU 182         | 3.14                | -0.9                                   |
|                 | H-acceptor          | ASN 183         | 4.32                | -1.0                                   |
|                 | H-acceptor          | LYS 84          | 3.33                | -1.2                                   |
|                 | H-acceptor          | LYS 84          | 3.32                | -3.0                                   |
|                 | pi-H                | ALA 195         | 3.73                | -1.0                                   |

**Table S6** Interaction summary of each hit compound with ULK1. Compound, interaction with residues in MEK, type of interaction, distance in angstroms and interaction energies.

| Compound | Interactions | Residues | Distance (Å) | Interaction energies (kcal/mol) |
|----------|--------------|----------|--------------|---------------------------------|
| 1        | H-donor      | ASP 165  | 3.13         | -2.3                            |
|          | H-donor      | CYS 95   | 2.95         | -3.0                            |
|          | pi-H         | VAL 30   | 4.13         | -0.7                            |
| 2        | H-donor      | MET 92   | 3.86         | -0.4                            |
|          | H-donor      | ASP 165  | 2.92         | -3.1                            |
|          | H-donor      | ASP 138  | 3.08         | -4.6                            |
|          | H-acceptor   | LYS 140  | 3.24         | -4.8                            |
|          | pi-H         | VAL 30   | 4.45         | -0.6                            |
| 3        | H-donor      | ASP 165  | 3.30         | -1.0                            |
|          | H-acceptor   | LYS 46   | 3.40         | -0.8                            |
|          | H-acceptor   | CYS 95   | 2.91         | -2.9                            |
| 4        | H-donor      | ASP 165  | 3.06         | -3.0                            |
|          | H-acceptor   | LYS 140  | 3.04         | -4.2                            |
|          | pi-H         | ASN183   | 4.35         | -0.8                            |
| 5        | H-donor      | CYS 95   | 3.31         | -0.4                            |
|          | H-acceptor   | GLN 142  | 3.88         | -0.8                            |
|          | pi-H         | GLY 98   | 3.69         | -0.7                            |

**Table S7** Interaction summary of MRT68921 with NUA1 and ULK1.

| Receptor | Docking energies (kcal/mol) | RMSD_refine (Å) | Interactions | Residues | Distance (Å) | Interaction energies (kcal/mol) |
|----------|-----------------------------|-----------------|--------------|----------|--------------|---------------------------------|
| NUAK1    | -15.6343                    | 1.3667          | H-donor      | GLY 139  | 3.08         | -4.3                            |
|          |                             |                 | H-acceptor   | LYS 63   | 3.28         | -7.5                            |
| ULK1     | -18.8131                    | 1.7720          | H-acceptor   | CYS 95   | 2.88         | -3.3                            |
|          |                             |                 | pi-H         | GLY 98   | 3.67         | -0.9                            |

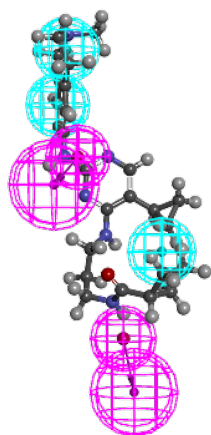

Fig. S3 Common feature pharmacophore generated by the 5 hits. MRT68921 matches the features of the pharmacophore.

Table S8 Fit values of the 5 hits and MRT68921 for common feature pharmacophore.

| Compound         | Fit value |
|------------------|-----------|
| ZINC000822294216 | 4.99933   |
| ZINC000826240974 | 3.24750   |
| ZINC000270620259 | 2.87123   |
| ZINC000561411090 | 2.83600   |
| ZINC000378284052 | 2.28828   |
| MRT68921         | 2.08435   |

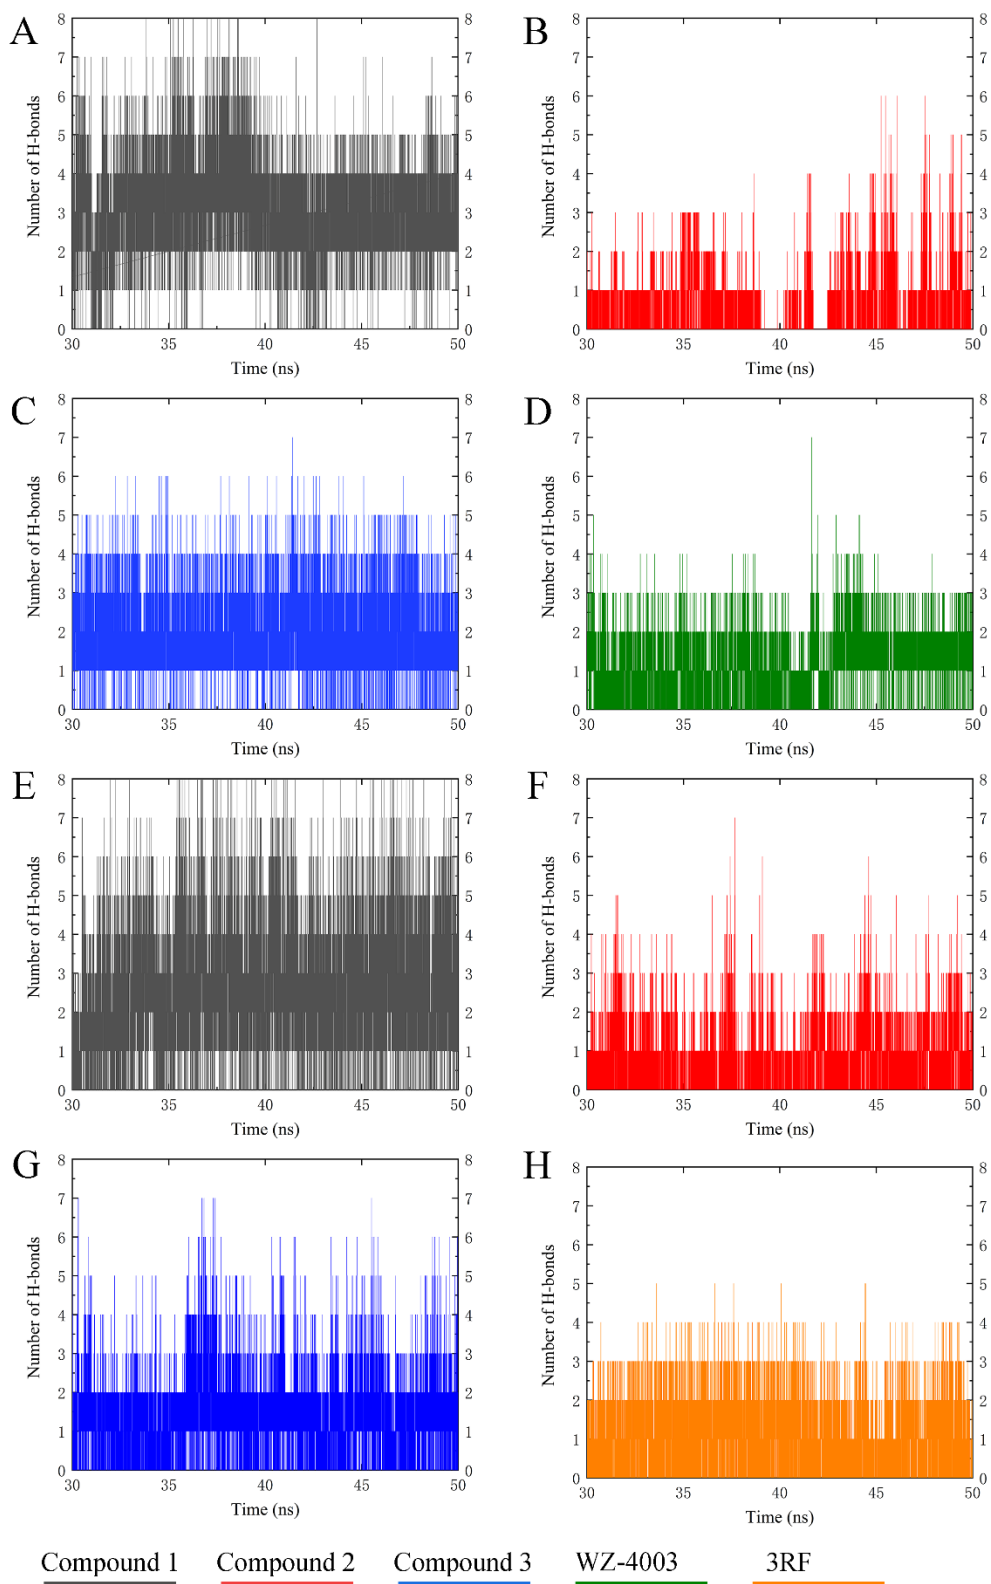

**Fig. S4** Hydrogen bond profiles of NUAK1 in complex with (A-C) compound 1-3 and (D) WZ-4003, hydrogen bond profiles of ULK1 in complex with (E-G) compound 1-3 and (H) 3RF.

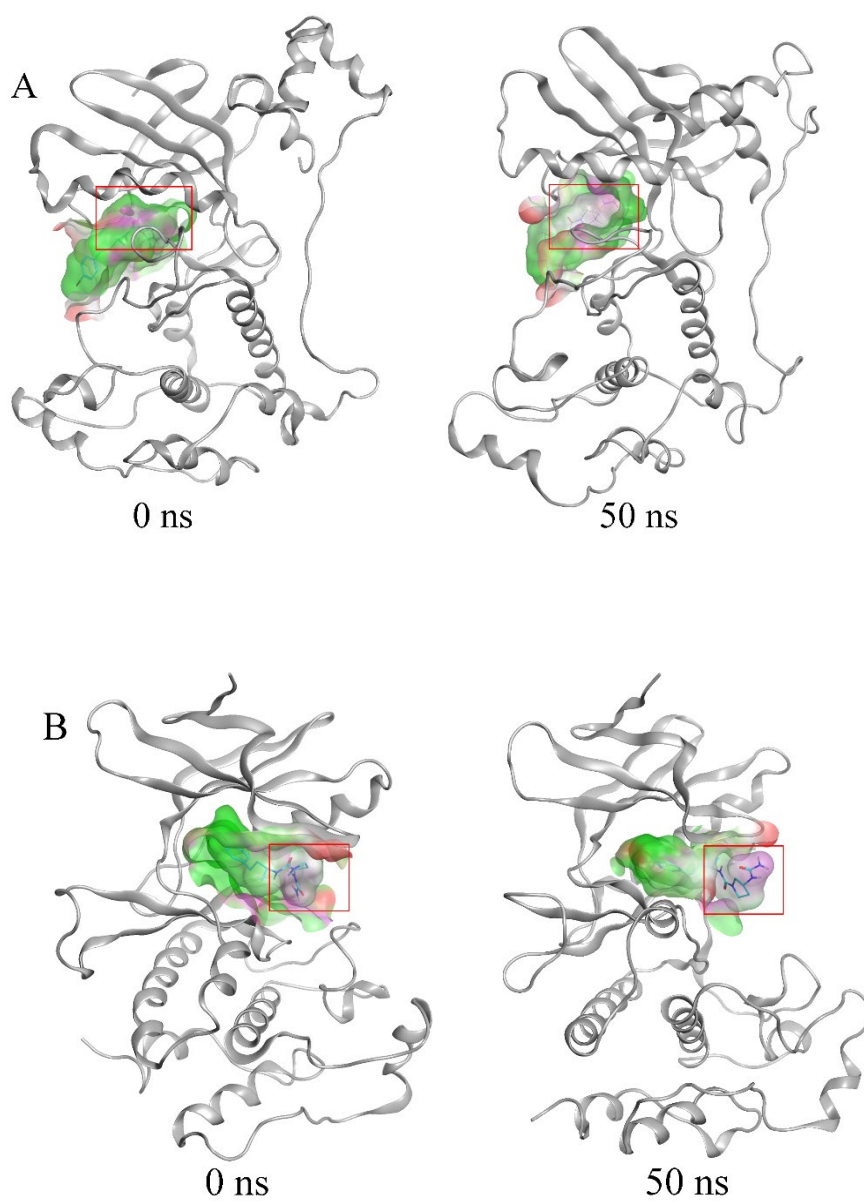

**Fig. S5** Snapshots obtained in the initial (0 ns) and final (50 ns) of MD simulations. A (NUAK1-compound 2), B (ULK1-compound 2). Fuchsia: polar hydrophilic area, green: non-polar hydrophobic area.



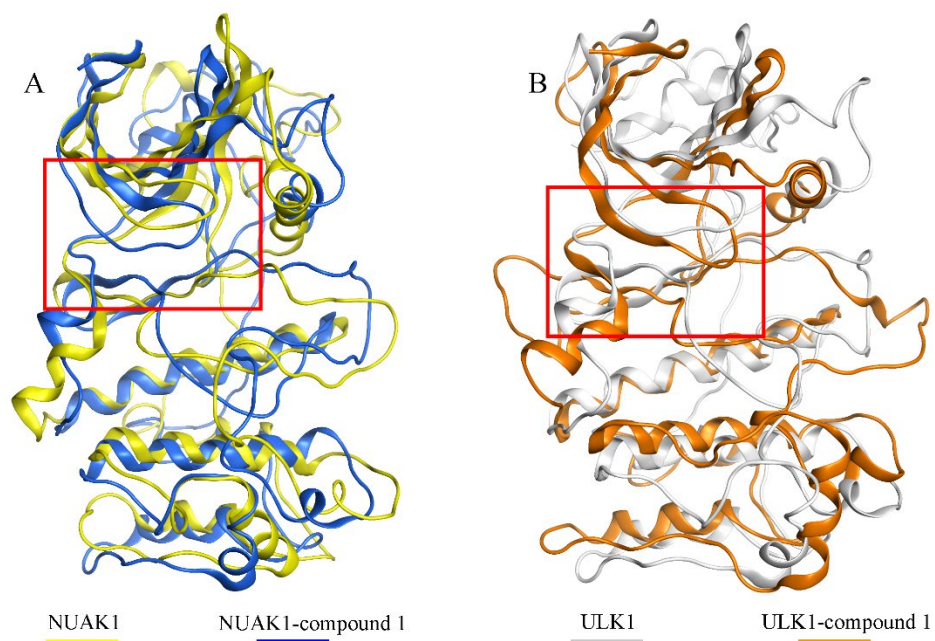

**Fig. S6** Structural superimpositions of (A) NUAK1 final conformations and (B) ULK1 final conformations of MD simulations (50ns).

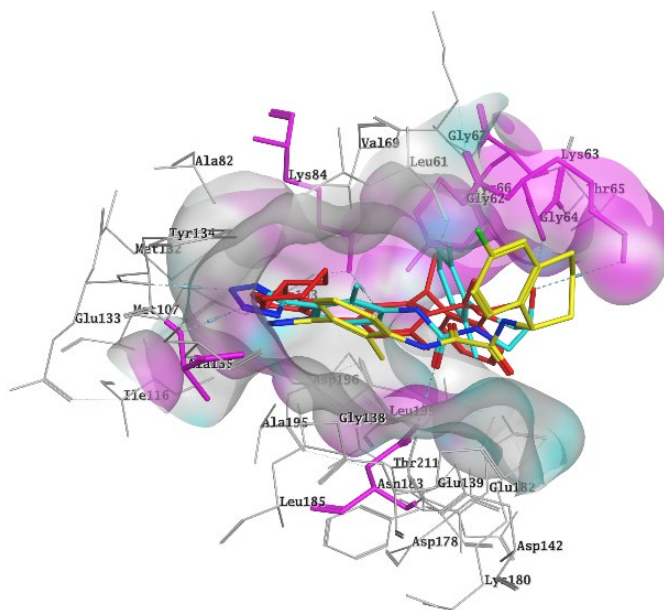

**Fig. S7** Binding modes of HMD-17-51 (red), compound 1 (blue) and 3 (yellow) with NUAK1. The three compounds have similar binding poses in the binding site.
